# Supplementary material
Source: Springer Nature journal article supplement (https://www.springermedizin.de/resource/supplementary/12889_2011_3491_MOESM3_ESM.pdf/9489182)
Supplement: MOESM3 [file 9489182]

RELEVANT  
LOGOS

# Event reporting by clinicians

RELEVANT  
LOGOS

Clinicians are uniquely positioned to identify events of potential public health significance and are expected to report unusual events of public health significance, which may be:

- Any outbreak of disease
- Any uncommon illness of potential public health significance
- Any infectious or infectious-like syndrome considered unusual by the clinician, based on:
  - **Frequency**
    - e.g., a sudden, unexplained, significant increase in the number of patients, especially when it occurs outside the normal season
  - **Circumstances of occurrence**
    - e.g., many patients coming from the same location or participating in similar activities
  - **Clinical presentation**
    - e.g., a patient's health rapidly deteriorating out of proportion to the presenting symptoms and diagnosis
  - **Severity**
    - e.g., a number of patients failing to respond to treatments

Examples of public health event reporting from clinicians in Europe:

"A hospital clinician saw 3 cases of cutaneous lesions, leading to hospitalization. This was reported to the district health authority, which started an investigation. A total of 40 cases of cow pox were identified all linked to domestic rats, imported from a neighbouring European country.

"A general practitioner reported a cluster of respiratory illness of unknown cause to the public health authorities. Through investigation, including specific diagnostic procedures, *Coxiella burnetii* (Q-fever) was identified."

## Contact Information:

Contact the Public Health Authority  
**24 hours a day, 7 days a week** at:

Phone: **123-456-7890**

Email: [report@report.com](mailto:report@report.com)

**When in doubt, report!**

## LOGOS:

Ministry of Health

Public Health  
Institute

More...

## LOGOS:

Medical  
Association A

Medical  
Association B

More...
